# Supplementary material for: EBI Metagenomics in 2017: enriching the analysis of microbial communities, from sequence reads to assemblies
Source: PubMed Central journal article supplement (PMC5753268; doi:10.1093/nar/gkx967), 2017-10-23
Supplement: gkx967_supp.pdf [file gkx967_supp.pdf]

| Sample biome    | Sub-biome              | Project identifiers                                                                                                                                                                                                                                                                                   | Number of assemblies |
|-----------------|------------------------|-------------------------------------------------------------------------------------------------------------------------------------------------------------------------------------------------------------------------------------------------------------------------------------------------------|----------------------|
| Aquatic         | Freshwater             | <i>PRJEB22523, PRJEB22543, PRJEB22524</i>                                                                                                                                                                                                                                                             | 4                    |
|                 | Glacier                | <i>PRJEB22516</i>                                                                                                                                                                                                                                                                                     | 3                    |
|                 | Lentic                 | <i>PRJEB22499</i>                                                                                                                                                                                                                                                                                     | 1                    |
|                 | Sediment               | <i>PRJEB22502, PRJEB22517, PRJEB22496</i>                                                                                                                                                                                                                                                             | 7                    |
|                 | Marine                 | <i>PRJEB22527, PRJEB22092</i>                                                                                                                                                                                                                                                                         | 142                  |
|                 | Coastal                | <i>PRJEB22525, PRJEB22509</i>                                                                                                                                                                                                                                                                         | 5                    |
|                 | Hydrothermal vents     | <i>PRJEB22510, PRJEB22514, PRJEB22397</i>                                                                                                                                                                                                                                                             | 14                   |
|                 | Salt marsh             | <i>PRJEB22494</i>                                                                                                                                                                                                                                                                                     | 1                    |
|                 | Oceanic                | <i>PRJEB22493, PRJEB22522</i>                                                                                                                                                                                                                                                                         | 9                    |
|                 | Photic zone            | <i>PRJEB22394</i>                                                                                                                                                                                                                                                                                     | 11                   |
|                 | Alkaline               | <i>PRJEB22526</i>                                                                                                                                                                                                                                                                                     | 1                    |
| Engineered      | Activated sludge       | <i>PRJEB22508, PRJEB22512, PRJEB22550, PRJEB22521</i>                                                                                                                                                                                                                                                 | 10                   |
| Host-associated | Human                  | <i>PRJEB22283, PRJEB22387, PRJEB22388, PRJEB22556</i>                                                                                                                                                                                                                                                 | 821                  |
|                 | Human, faecal          | <i>PRJEB22492, PRJEB22505, PRJEB22513, PRJEB22495, PRJEB22501, PRJEB22498, PRJEB22392, PRJEB22359, PRJEB22360, PRJEB22519, PRJEB22529, PRJEB22395, PRJEB22538, PRJEB22365, PRJEB22542, PRJEB22391, PRJEB22547, PRJEB22549, PRJEB22389, PRJEB22393, PRJEB22552, PRJEB22368, PRJEB22554, PRJEB22362</i> | 1108                 |
|                 | Human, large intestine | <i>PRJEB22528</i>                                                                                                                                                                                                                                                                                     | 1                    |
|                 | Human, oral            | <i>PRJEB22520</i>                                                                                                                                                                                                                                                                                     | 1                    |
|                 | Human, skin            | <i>PRJEB22555</i>                                                                                                                                                                                                                                                                                     | 5                    |
|                 | Rumen                  | <i>PRJEB22504, PRJEB22623</i>                                                                                                                                                                                                                                                                         | 6                    |
|                 | Soil                   | <i>PRJEB22518, PRJEB22546, PRJEB22551, PRJEB22533, PRJEB22511, PRJEB22503, PRJEB22544, PRJEB22540, PRJEB22396, PRJEB22366, PRJEB22627, PRJEB22625, PRJEB22624</i>                                                                                                                                     | 129                  |
|                 | Agricultural           | <i>PRJEB22531</i>                                                                                                                                                                                                                                                                                     | 1                    |
|                 | Forest soil            | <i>PRJEB22506</i>                                                                                                                                                                                                                                                                                     | 5                    |
|                 | Grasslands             | <i>PRJEB22497, PRJEB22500, PRJEB22628</i>                                                                                                                                                                                                                                                             | 5                    |
|                 | Permafrost             | <i>PRJEB22530</i>                                                                                                                                                                                                                                                                                     | 4                    |
|                 | Sand                   | <i>PRJEB22545</i>                                                                                                                                                                                                                                                                                     | 3                    |
|                 | Wetlands               | <i>PRJEB22541</i>                                                                                                                                                                                                                                                                                     | 1                    |

**Supplementary Table 1. Distribution of EBI Metagenomics assemblies according to source biome.** The table lists the source biome, sub-biome (where available) and ENA identifiers of projects that have been assembled and analysed by EBI Metagenomics. The total number of assemblies for each sub-biome is also shown.
